# Supplementary material
Source: PubMed Central journal article supplement (PMC1280311)
Supplement: jbacter_187_22_7784__1.pdf [file jbacter_187_22_7784__1.pdf]

RPA0130  
RPA0131  
RPA0132 0.888545 0.763  
RPA0133 1.220335 0.12 1.410773 **0.018** 1.306739 **0.0185** 0.842928 0.84  
RPA0134 1.484503 **0.0015** 1.62489 **0.0075** 1.194033 0.042 1.239486 0.0815 1.178606 0.098  
RPA0135 1.011716 0.458 1.00011 0.487 1.259207 0.0515 1.040645 0.375 0.829044 0.9665  
RPA0136 0.624085 **0.9995** 0.63665 1 0.515142 **0.9995** **0.499823** **0.999** 0.777172 **0.9825**  
RPA0137 0.735113 **0.9965** 0.709509 **0.991** 0.549727 **0.998** 0.596163 **0.9985** 0.928899 0.785  
RPA0138 0.583708 1 0.624904 **0.998** 0.5699 1 0.368729 1 0.691739 **0.9895**  
RPA0139 0.577225 **0.999** 0.61478 **0.9995** 0.553989 **0.999** 0.283171 1 0.625749 **0.9985**  
RPA0140 **0.451051** **0.9995** 0.555527 1 0.414783 **0.9995** 0.215518 **0.999** 0.402375 **0.998**  
RPA0141 0.52143 **0.997** 0.565469 1 0.474672 **0.999** 0.23119 0.999 0.3499 1  
RPA0142 0.888645 0.8755 0.576611 **0.999** 0.544005 **0.9995** 0.319591 **0.9975** 0.505382 **0.9975**  
RPA0143 **0.478001** 1 0.476834 **0.9995** 0.443137 **0.9985** 0.254511 **0.999** 0.375456 **0.997**  
RPA0144 **0.455214** **0.997** 0.409821 1 0.618512 0.9725 0.351441 **0.997** 0.251398 **0.995**  
RPA0145 **0.425927** 1 0.367451 1 0.364661 **0.9995** 0.235618 1 0.461493 **0.999**  
RPA0146 0.756112 **0.9935** 0.857285 **0.8445** 0.781633 0.9665 0.835734 0.9605 0.501777 **0.9995**  
RPA0147 0.8992 0.878 0.759747 **0.992** 0.947251 0.75 0.932318 0.684 0.929418 0.8  
RPA0148 0.867154 0.64  
RPA0149 1.033396 0.4245 1.508502 0.081 1.46597 **0.017** 1.120894 0.442 1.617756 0.125  
RPA0150 0.514552 0.925  
RPA0151 0.646962 1 0.554521 **0.9905** 0.791972 0.95 0.590565 **0.992** 0.660064 **0.9795**  
RPA0152 0.735863 **0.98** 0.751325 0.9615 0.611219 0.887  
RPA0153 1.061957 0.1875 1.058784 0.301 1.219847 0.178 0.920756 0.845  
RPA0154  
RPA0155  
RPA0156 1.105484 0.0965 0.984631 0.552 1.053259 0.4315  
RPA0157 1.847239 **0.015** **4.519621** **0.0005** **2.212045** **0.0015** 1.451273 0.133 **3.026495** **0.001**  
RPA0158 0.939579 0.843 1.278045 **0.0165** 0.664298 **0.995** 0.994566 0.5025 1.374289 0.04  
RPA0159 0.791896 **0.9755** 0.833593 **0.9765** 0.961124 0.644 1.006904 0.4815 1.104118 1.1405  
RPA0160 **0.471292** 1 0.374755 **0.999** 0.618768 **0.9875** **0.486937** 0.958 0.569839 **0.9945**  
RPA0161 1.201864 0.1285 1.519721 **0.012** 1.060442 0.2295 1.201615 0.068 1.012594 0.462  
RPA0162 0.92947 0.859 0.942008 0.8045 0.905844 0.8845 0.921137 0.8255 0.994222 0.514  
RPA0163 0.707499 **0.9935** 0.740595 **0.9915** 0.633816 1 0.66227 0.925 0.757516 **0.984**  
RPA0164 1.008779 0.4605 0.75208 **0.9885** 0.725164 0.954 0.816286 0.879 0.953562 0.718  
RPA0165 1.0202952 0.4895 0.987875 0.535 0.987875 0.535 1.020788 0.451 1.059169 0.3815  
RPA0166 0.920732 0.7965 0.802523 0.97 1.289226 **0.006** 1.132993 0.115 0.93087 0.7495  
RPA0167 0.932672 0.6575 1.201679 0.1435 1.280206 0.071 1.795982 **0.009** 1.437663 **0.002**  
RPA0168 0.948761 0.71 0.944664 0.7285 1.05168 0.3505 1.299637 0.03 1.646213 **0.0005**  
RPA0169 0.806983 **0.9915** 0.78704 **0.9945** 0.903761 0.9085 0.838047 0.942 1.003815 0.475  
RPA0170 0.830926 **0.9675** 0.640762 **0.998** 0.858938 0.9015 0.670715 **0.991** 0.869616 0.899  
RPA0171 0.789109 **0.996** 0.682862 **0.992** 0.96746 0.673 0.846876 0.914 0.964397 0.649  
RPA0173 0.864868 0.9495 1.057975 0.2035 0.692279 **0.997** 0.951467 0.7155 0.965718 0.642  
RPA0174 0.707656 0.919 0.746645 0.936  
RPA0175 0.760694 **0.9875** 0.855834 0.9295 0.928046 0.811 0.939604 0.7835 0.883238 0.7685  
RPA0176 0.956985 0.7175 0.843388 0.9415 0.855458 0.9535 0.756415 **0.9755** 0.81531 0.88  
RPA0177 0.826796 0.826 0.988751 0.537 0.821416 0.975 0.687436 **0.9825** 0.689309 0.962  
RPA0178 0.95127 0.6495 0.935191 0.714 0.85436 0.88 0.799776 0.956 0.829301 0.954  
RPA0179 0.848094 0.8915 1.295722 0.0425 0.735958 0.8895 0.862147 0.6745 1.007653 0.4595  
RPA0180 1.331932 **0.0065** 1.850823 **0.005** 1.472628 **0.0165** 1.024448 0.447 0.919313 0.8085  
RPA0181 0.850829 **0.9755** 0.852403 0.9705 0.898761 0.9225 0.669838 **0.999** 0.746378 **0.996**  
RPA0182 0.947008 0.7465 0.815366 0.861 0.91533 0.806 0.702639 0.951 0.84738 0.939  
RPA0183 0.821032 0.9575 0.881299 0.8805 0.775627 **0.985** 0.57078 **0.999** 0.749371 **0.9895**  
RPA0184 0.840462 0.8705 0.913921 0.7645 1.078257 0.223 0.954231 0.5995 1.050772 0.345  
RPA0185 1.009289 0.456 0.962652 0.716 1.114385 0.1255 0.997994 0.5185 0.872639 0.9485  
RPA0186 0.872306 0.8655 0.933237 0.8435 0.861342 0.9735 0.726723 **0.9955** 0.767821 **0.9895**  
RPA0187 0.693967 **0.9865** 0.83952 0.903 0.981935 0.583 0.861272 0.8065 0.836207 0.96  
RPA0188 0.957854 0.6085 1.004052 0.459 0.896896 0.8795 0.940152 0.677 0.871997 0.9165  
RPA0189 1.10153 0.1755 1.018933 0.38 1.355267 **0.0055** 1.028258 0.3795 1.047778 0.3195  
RPA0190 1.004648 0.475 0.859614 0.955 0.875345 0.887 0.804194 **0.9815** 0.744286 0.917  
RPA0191 0.977623 0.5645 0.97742 0.5885 0.872315 0.894 0.829399 0.9405 0.874235 0.8415  
RPA0192 1.071643 0.233 1.057577 0.3045 0.879345 0.9025 1.058486 0.3545 0.99068 0.55  
RPA0193 1.036385 0.313 1.107868 0.1795 0.903909 0.8205 0.962589 0.596 0.926543 0.7165  
RPA0194 0.799001 0.9415 0.621382 **0.998** 1.148528 0.206 0.852448 0.851 1.190923 **0.0245**  
RPA0195 0.69299 **0.9825** 0.729632 0.957 0.999524 0.4995 0.65646 **0.9965** 0.827902 0.971  
RPA0196 0.659493 **0.9975** 0.760901 **0.9945** 0.893503 0.866 0.644831 **0.998** 0.683946 **0.999**  
RPA0197 0.815634 **0.979** 0.69322 **0.981** 0.923976 0.8475 0.636925 **0.9955** 0.772599 **0.9875**  
RPA0198 1.164311 0.0355 1.149637 0.1935 1.181547 0.1 1.093002 0.2665 1.119564 0.1015  
RPA0199 1.119672 0.147 1.247695 0.0285 1.082542 0.3305 1.296367 0.055 1.325696 0.025  
RPA0200 0.981852 0.5785 0.645565 **0.9925** 1.35042 0.0635 1.175272 0.125 1.223294 0.0445  
RPA0201 1.039265 0.287 0.811426 **0.9915** 1.285195 0.0425 0.898577 0.866 0.752438 0.9305  
RPA0202 0.982204 0.5985 0.79214 **0.9815** 0.793478 0.912 0.806487 0.904 0.750053 0.9705  
RPA0203 0.898183 0.751 0.992138 0.5125 0.830639 0.8065 0.811792 0.8985  
RPA0204 0.957709 0.6475 0.855194 0.9315 0.794475 **0.983** 0.664202 **0.9775** 0.795755 **0.985**  
RPA0205 0.856985 0.945 0.843632 0.9695 0.848662 0.9635 0.719505 **0.9915** 0.860133 0.9455  
RPA0206 0.943899 0.711 1.121305 0.11 0.896734 0.8165 0.799849 0.877 0.824621 **0.982**  
RPA0207 0.596666 **0.994** 0.677559 **0.999** 1.064485 0.3375 0.532418 **0.9985** 0.926925 0.704

CDS transcriptional regulator, LysR family 146733:147611 forward MW:31851  
CDS ABC sulfate transport system, ATP-binding protein 147617:148312 reverse MW:24706  
CDS ABC sulfonate transport system, permease protein 148309:149082 reverse MW:27062  
CDS ABC sulfate transport system, periplasmic binding protein 149072:150064 reverse MW:35234  
CDS possible oxidoreductase 151939:153960 reverse MW:73333  
CDS methyl-accepting chemotaxis receptor/sensory transducer 154100:155809 reverse MW:60855  
cheB1 chemotaxis methyltransferase, CheB1 155814:156905 reverse MW:39080  
cheR1 chemotaxis methyltransferase, CheR1 156926:157768 reverse MW:32305  
CDS methyl-accepting chemotaxis receptor/sensory transducer 157930:160131 reverse MW:77029  
cheW1-3 chemotaxis signal transduction/oligomerization protein CheW1-2 160198:160686 reverse MW:17416  
CDS methyl-accepting chemotaxis receptor/sensory transducer CheW1-1 160747:161217 reverse MW:17318  
cheA1 multidomain chemotaxis histidine kinase CheA1 (Hpt, CheA, & CheW domains) 161217:163283 reverse MW:74391  
cheY1 response regulator receiver, CheY1 163280:163645 reverse MW:12910  
CDS Sulfate transporter/antisigma-factor antagonist domain 163645:163968 reverse MW:11491  
CDS Metal dependent phosphohydrolase with a response regulator receiver domain 164246:165412 forward MW:42854  
CDS hypothetical protein 165452:165883 forward MW:15493  
CDS transcriptional regulator, ModE family 165961:166752 reverse MW:28515  
CDS conserved hypothetical protein 166873:167409 reverse MW:18860  
CDS possible ABC-type iron-siderophore transport system ATP-binding protein 167433:168227 reverse MW:28098  
CDS putative ABC transporter, iron, hemin permease homolog 168224:169246 reverse MW:35269  
CDS possible iron ABC transporter periplasmic binding protein 169248:170297 reverse MW:38157  
CDS Protein of unknown function, UPF0066 170294:170797 reverse MW:18611  
CDS possible outer membrane receptor for Fe transport 171435:173618 forward MW:81136  
CDS possible MoTa/TolQ/ExbB proton channel family 173675:174313 forward MW:21964  
CDS putative tolR/exbB protein 174326:174793 forward MW:16572  
CDS tonB like protein 174790:175608 forward MW:28869  
CDS conserved unknown protein 175963:177126 reverse MW:42540  
rplU, L21 putative ribosomal protein L21 177448:177828 forward MW:13490  
rpmA, L27 ribosomal protein L27 177918:178190 forward MW:9581  
CDS possible acetyltransferases. 178325:178924 forward MW:22367  
CDS Permeases of the drug/metabolite transporter (DMT) superfamily 179631:180536 reverse MW:31850  
CDS possible GTP-binding proteins 180688:181749 forward MW:37743  
proB glutamate 5-kinase 181888:183018 forward MW:39511  
proA gamma-glutamyl phosphate reductase 183222:184514 forward MW:45120  
CDS possible nicotinate-nucleotide adenylyltransferase 184539:185168 forward MW:23301  
CDS lojap-related protein 185539:185835 forward MW:10815  
CDS DUF163 185925:186407 forward MW:17680  
CDS putative filament-A precursor 186427:187818 forward MW:48939  
ctpA putative periplasmic carboxyl-terminal processing protease 187815:189191 forward MW:48865  
CDS conserved hypothetical protein 189342:190580 forward MW:43466  
invA1 putative dinucleoside polyphosphate hydrolase (AP4A pyrophosphatase) (invasion protein A, NUDIX family, NUDH subfamily. 190619:191125 forward MW:19281  
CDS putative sugar nucleotide dehydratase 192604:193551 forward MW:35524  
invA2 putative dinucleoside polyphosphate hydrolase (AP4A pyrophosphatase) (invasion protein A, NUDIX family hydrolase, NUDH subfamily. 193548:194069 forward MW:20010  
atpC putative H<sup>+</sup>-transporting ATP synthase epsilon chain. 194253:194660 reverse MW:14258  
atpD putative H<sup>+</sup>-transporting ATP synthase beta chain. 194774:196204 reverse MW:50717  
atpG putative H<sup>+</sup>-transporting ATP synthase gamma chain. 196276:197151 reverse MW:31934  
atpF putative H<sup>+</sup>-transporting ATP synthase alpha chain. 197295:198827 reverse MW:55178  
atpH putative H<sup>+</sup>-transporting ATP synthase delta chain. 198827:199387 reverse MW:19513  
rlpA1 Rare lipoprotein A 200091:200561 forward MW:16327  
priA putative priA family helicase (primosomal protein N', replication factor Y) 200717:202927 reverse MW:80828  
xerC putative site-specific recombinase, INTEGRASE/RECOMBINASE RIFX (xerC) 202981:204096 forward MW:40167  
CDS unknown protein 204237:204827 forward MW:21072  
CDS hypothetical protein 204891:205433 reverse MW:20379  
ddlH dihydrolipoamide dehydrogenase, E3 component of 2-oxoglutarate and pyruvate dehydrogenase complexes 205473:206876 reverse MW:48588  
CDS putative short-chain dehydrogenase/reductase 206908:207654 reverse MW:25283  
CDS conserved hypothetical protein 207662:208111 reverse MW:15999  
sucB dihydrolipoamide succinyl transferase 208123:209376 reverse MW:43864  
sucA putative alpha-ketoglutarate dehydrogenase (E1 subunit) 209481:212438 reverse MW:111339  
sucD succinyl-CoA synthetase alpha-subunit 212566:213450 reverse MW:30063  
sucC succinyl-coA synthetase beta chain 213515:214711 reverse MW:42318  
mdh malate dehydrogenase 214807:215775 reverse MW:33996  
CDS AFG1-like ATPase 215921:217105 reverse MW:43902  
CDS 2\_5' RNA ligase 217188:217727 reverse MW:19693  
tesA putative acyl-CoA thioesterase precursor 217933:218601 reverse MW:23301  
CDS putative ABC transporter, ATP-binding protein 218627:219370 forward MW:25712  
CDS possible ABC transporter permeases 219374:221944 forward MW:90195  
CDS possible acetate transporter, stationary-phase anti-death (SAD) family 222285:223076 forward MW:28252  
CDS putative phosphoinositide acetyltransferase 223231:223761 forward MW:18852  
CDS conserved hypothetical protein 223821:224189 reverse MW:13710  
CDS conserved hypothetical protein 224593:225468 reverse MW:30891  
acnA acconitate hydratase 225515:228232 reverse MW:98545  
cycY, ccmA heme exporter protein A (heme ABC transporter ATP-binding protein), cytochrome c biogenesis 228448:229050 forward MW:21079  
cycW, ccmB putative heme exporter protein B (heme ABC transporter membrane protein), cytochrome c biogenesis 229047:229715 forward MW:22546  
cycZ, ccmC heme exporter protein C (ABC transporter permease component) 229808:230542 forward MW:26684  
cycY, ccmG putative cytochrome c biogenesis protein, thiol:disulfide interchange protein 230732:231328 forward MW:21366  
CDS unknown protein 231468:231866 forward MW:13746
